# Supplementary figures and images for: When the Beetles Hit the Fan. The Fan-Trap, an Inexpensive, Light and Scalable Insect Trap under a Creative Commons License, for Monitoring and Experimental Use
Source: Preprints.org preprint supplement (doi:10.20944/preprints202210.0279.v1), 2022-10-19

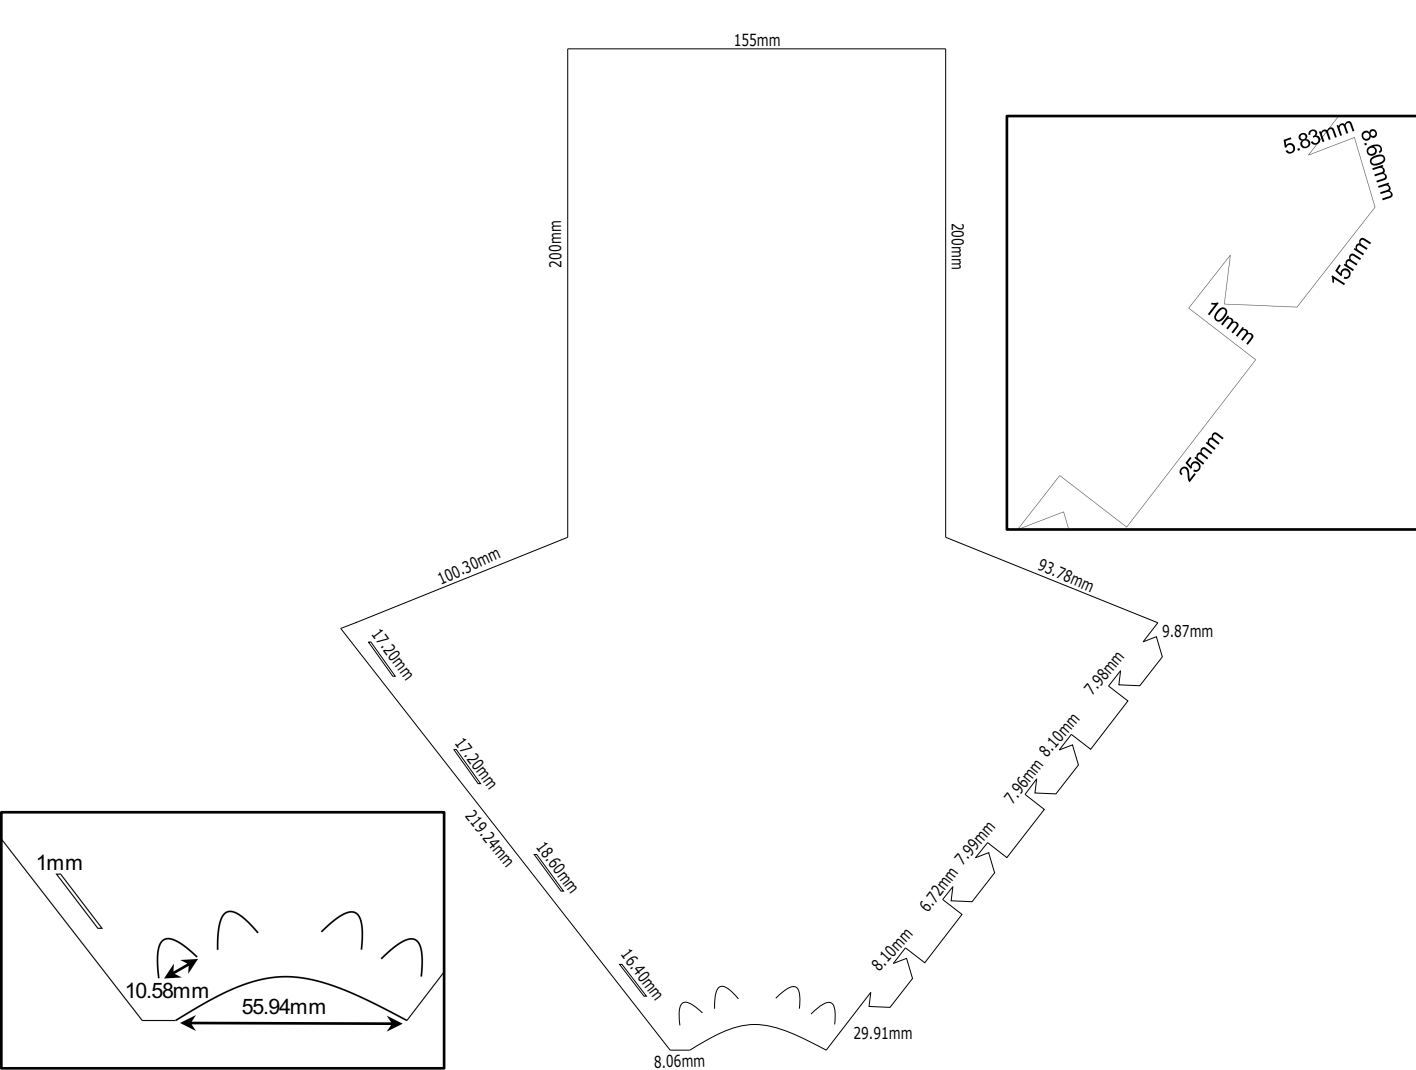

Supplement: Supplementary file 1 [file supplementary]
